# Supplementary material for: pH-controlled regioselective nucleophilic ring-opening of epoxide: an improved process for the preparation of (R)-(−)- or (S)-(+)-3-hydroxytetrahydrofuran
Source: Royal Society of Chemistry journal article supplement (doi:10.1039/d2ob01314b), 2022-01-01
Supplement: d2ob01314b1.pdf [file d2ob01314b1.pdf]

## Supplementary material

for

### pH-controlled regioselective nucleophilic ring opening of epoxide: Improved process for the preparation of (*R*)-(-)- or (*S*)-(+)-3-hydroxytetrahydrofuran.

Ankita Chakraborty,<sup>†a,b</sup> Avula Shiva Krishna,<sup>†a,b</sup> Gurralla Sheelu,<sup>a</sup> Subhash Ghosh,<sup>a,b</sup> and Thenkrishnan Kumaraguru<sup>\*a,b</sup>

<sup>a</sup>Department of Organic Synthesis and Process Chemistry, CSIR-Indian Institute of Chemical Technology, Hyderabad 500 007, India.

<sup>b</sup>Academy of Scientific and Innovative Research (AcSIR), Ghaziabad 201 002, India.

Corresponding author:

[kumaraguru@iict.res.in](mailto:kumaraguru@iict.res.in)

#### Table of contents

|                                                                                               |     |
|-----------------------------------------------------------------------------------------------|-----|
| 1. General experimental information.....                                                      | S2  |
| 2. Characterization data of compounds .....                                                   | S2  |
| 3. <sup>1</sup> H NMR and <sup>13</sup> C NMR and Mass spectra for synthesized compounds..... | S3  |
| 4. GC Chromatograms.....                                                                      | S7  |
| 5. Comparison of present work with reported methods .....                                     | S11 |
| 6. References.....                                                                            | S12 |

## 1. General information

$^1\text{H}$  NMR spectra were determined in  $\text{CDCl}_3$  using a Bruker AC 400 spectrometer at operating at 400 MHz, using TMS as an internal standard. Splitting patterns are as follows: *s*, singlet; *d*, doublet; *m*, multiplet; *br*, broad signal. The  $^{13}\text{C}$  NMR spectrum was obtained using the same apparatus described above at 100 MHz. Epichlorohydrin was purchased from Sigma-Aldrich and was utilized as the chromatographic standard in TLC analysis. The progress of the reactions was monitored by TLC and GC. The chromatograms were visualized using a solution of  $\text{KMnO}_4$  in water.

## 2. Characterisation data of synthesized compounds

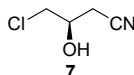

**4-chloro-3-hydroxybutanenitrile (7):** Pale yellowish oil, IR (neat):  $\nu$  3422, 2963, 2257, 1632, 1419, 1302, 1088  $\text{cm}^{-1}$ ;  $^1\text{H}$  NMR (400MHz,  $\text{CDCl}_3$ ):  $\delta$  4.24-4.17 (m, 1H), 3.71- 3.63 (m, 2H), 3.10 (d,  $J=$  4Hz, 1H), 2.78-2.67 (m, 2H),  $^{13}\text{C}$  NMR (100MHz,  $\text{CDCl}_3$ ):  $\delta$  117.1, 67.4, 47.3, 23.3.

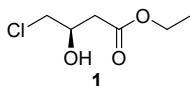

**Ethyl- (R)-4-chloro-3-hydroxybutanoate (1)** Yellowish oil, IR (neat):  $\nu$  3449, 2983, 1725, 1637, 1380, 1192, 1031  $\text{cm}^{-1}$ ;  $^1\text{H}$  NMR (400MHz,  $\text{CDCl}_3$ ):  $\delta$  4.27-4.22 (m, 1H), 4.17 (q,  $J=$  8Hz, 2H), 3.63-3.56 (m, 2H), 3.17 (d,  $J=$  4 Hz, 1H), 2.66-2.57 (m, 2H), 1.26 (t,  $J=$  4Hz, 3H),  $^{13}\text{C}$  NMR (100MHz,  $\text{CDCl}_3$ ):  $\delta$  171.8, 68.0, 61.1, 48.2, 38.6, 14.2, MS (ESI)  $m/z$  ( $\text{M}+\text{Na}$ ) $^+$  calculated for  $\text{C}_6\text{H}_{11}\text{ClO}_3\text{Na}$ : 189, observed: 189.

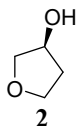

**(R)-3-hydroxytetrahydrofuran (2):** Colourless oil, IR (neat):  $\nu$  3410, 2952, 2882, 1764, 1647, 1054 $\text{cm}^{-1}$ ,  $^1\text{H}$  NMR (400MHz,  $\text{CDCl}_3$ ): 4.52-4.49 (m, 1H), 4.0- 3.95(m, 1H), 3.87-3.74 (m, 3H), 2.16-2.04 (m, 1H), 1.95-1.87 (m, 1H),  $^{13}\text{C}$  NMR (100MHz,  $\text{CDCl}_3$ ): 75.8, 72.3, 66.8, 35.8.  $[\alpha]_{\text{D}}^{23.9} = -16.99$  ( $c=$  2.45,  $\text{CH}_3\text{OH}$ ), lit<sup>18</sup>  $[\alpha]_{\text{D}}^{23} = -17.3$  ( $c=$  2.4,  $\text{CH}_3\text{OH}$ ).

**<sup>1</sup>H NMR of 7 (400 MHz, CDCl<sub>3</sub>)**

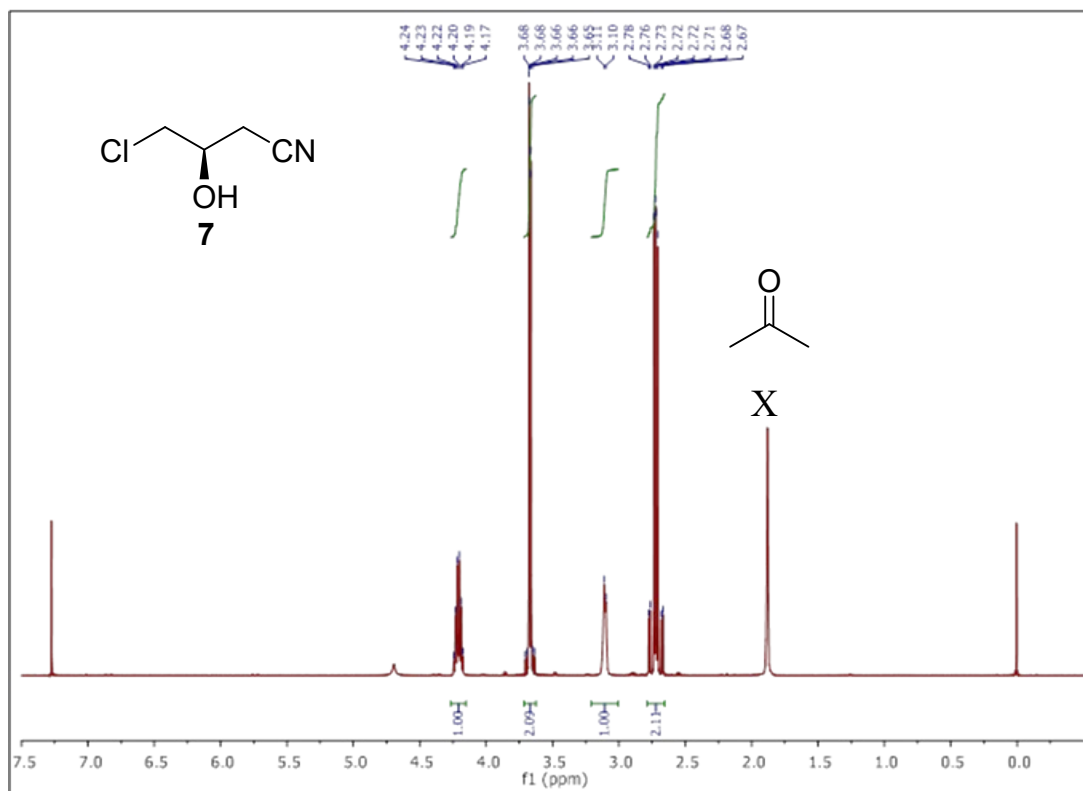

**<sup>13</sup>C NMR of 7 (100 MHz, CDCl<sub>3</sub>)**

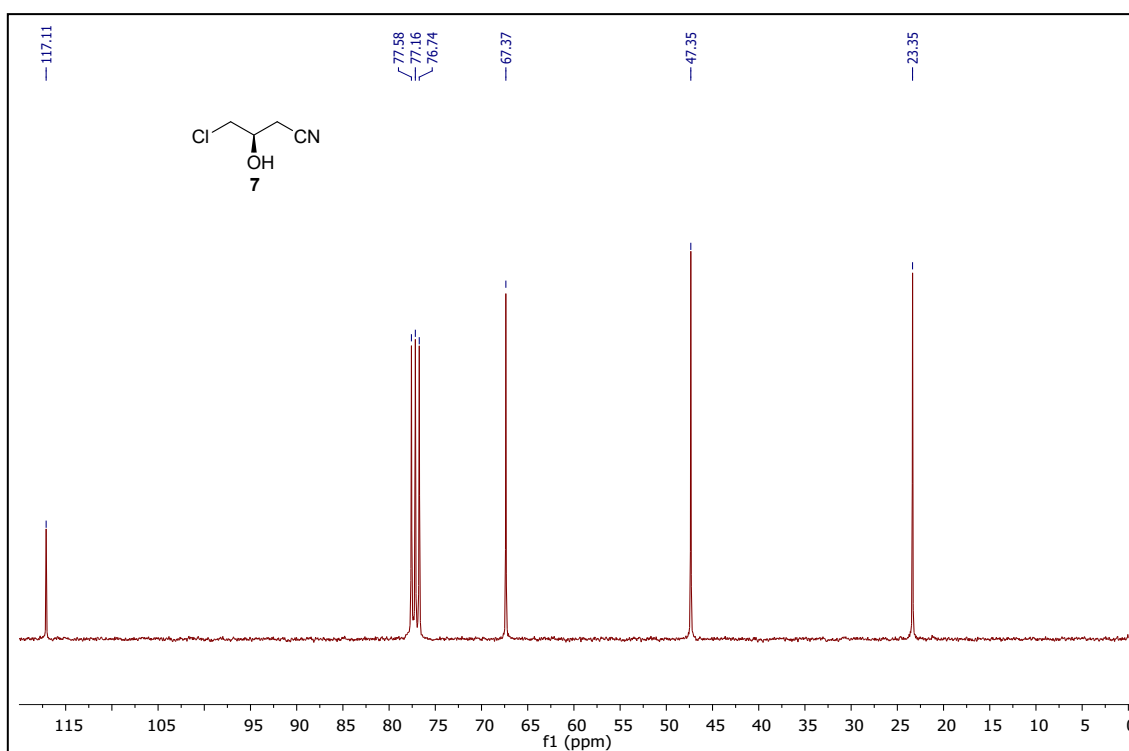

### <sup>1</sup>H NMR of 1 (400MHz, CDCl<sub>3</sub>)

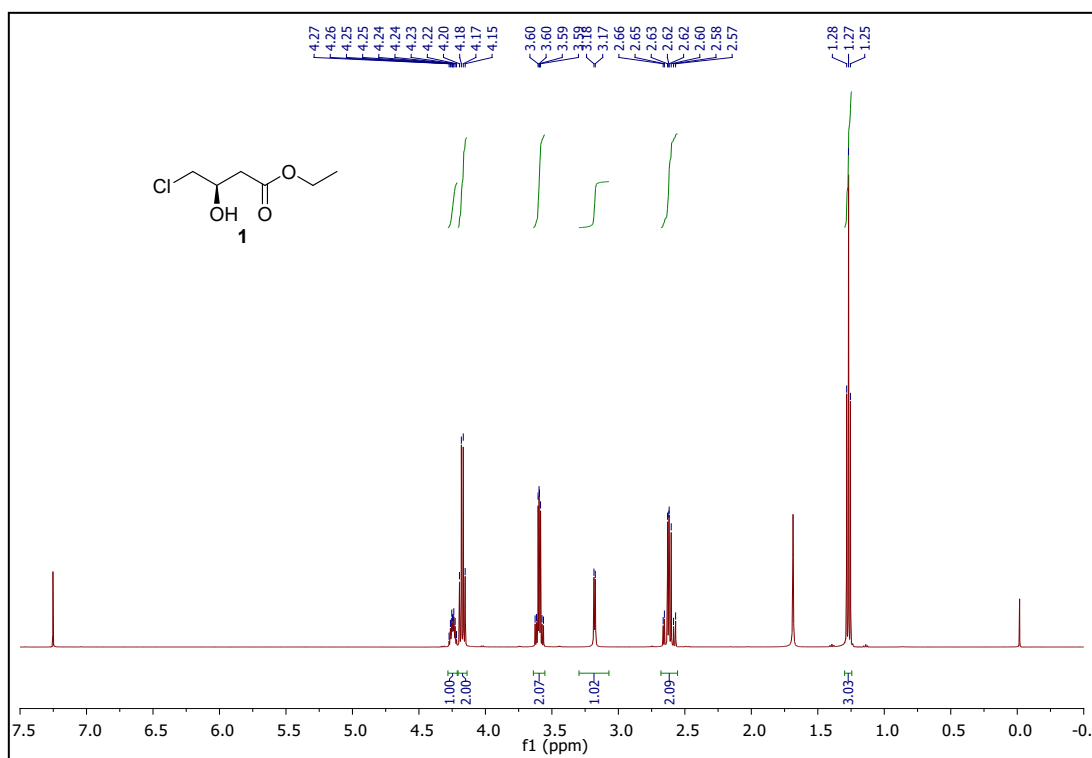

### <sup>13</sup>C NMR of 1 (100 MHz, CDCl<sub>3</sub>)

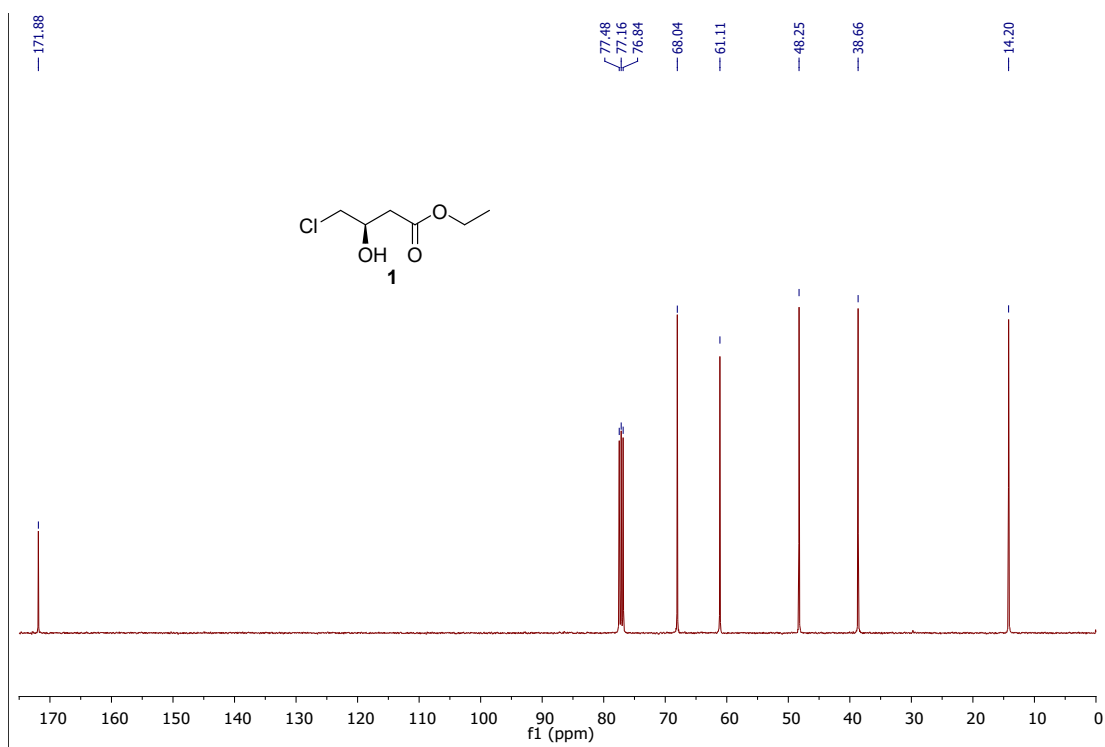

### Mass spectra (ESI) of 1

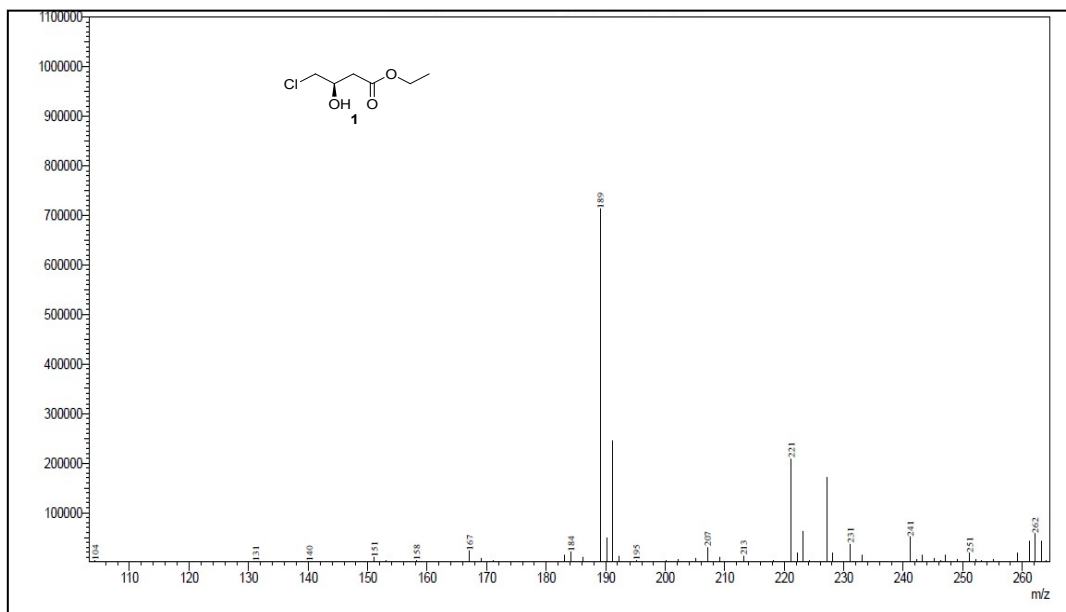

### <sup>1</sup>H NMR of 2 (400MHz, CDCl<sub>3</sub>)

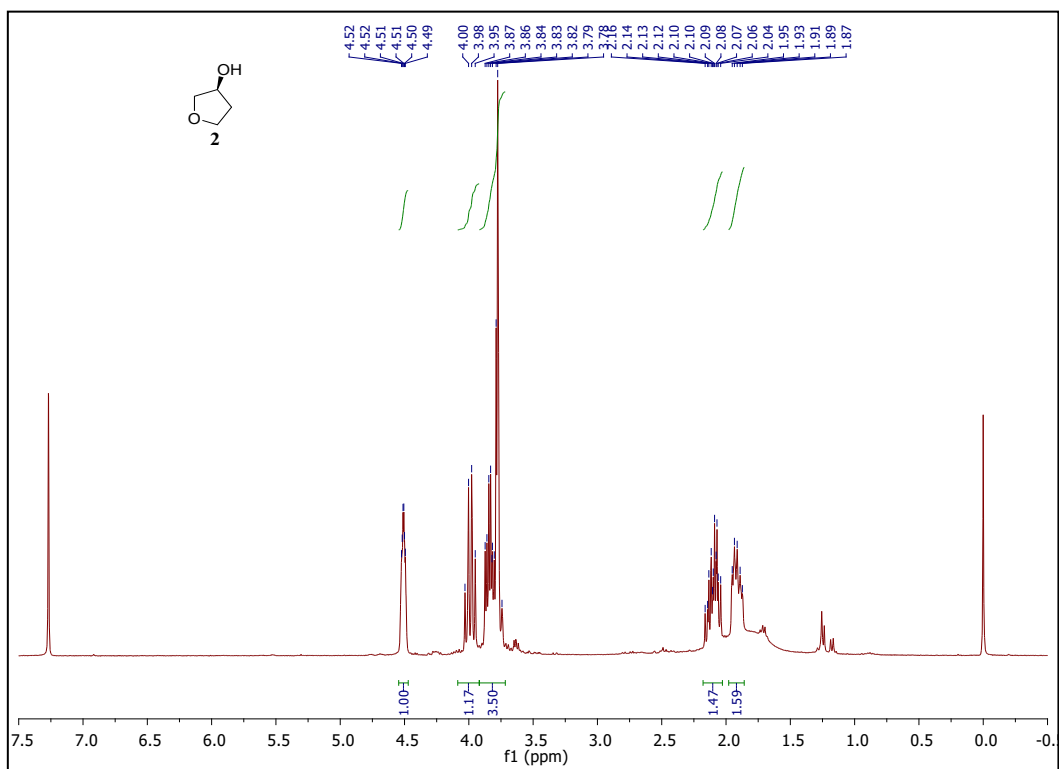

**$^{13}\text{C}$  NMR of 2 (100 MHz,  $\text{CDCl}_3$ )**

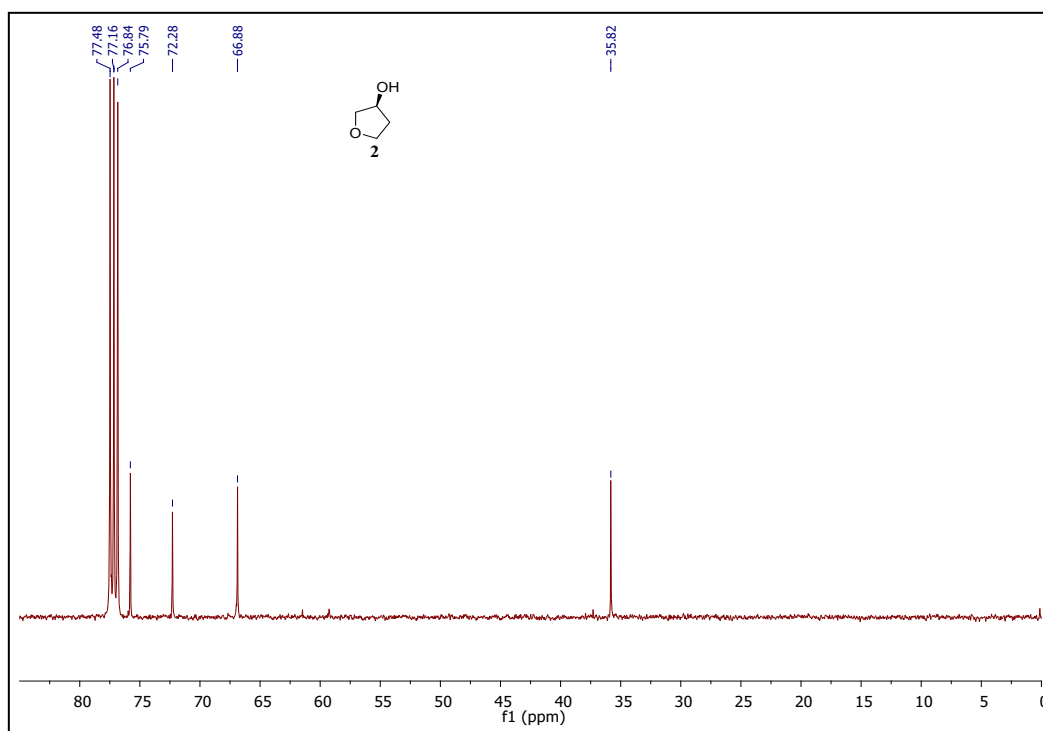

# GC CHROMATOGRAMS

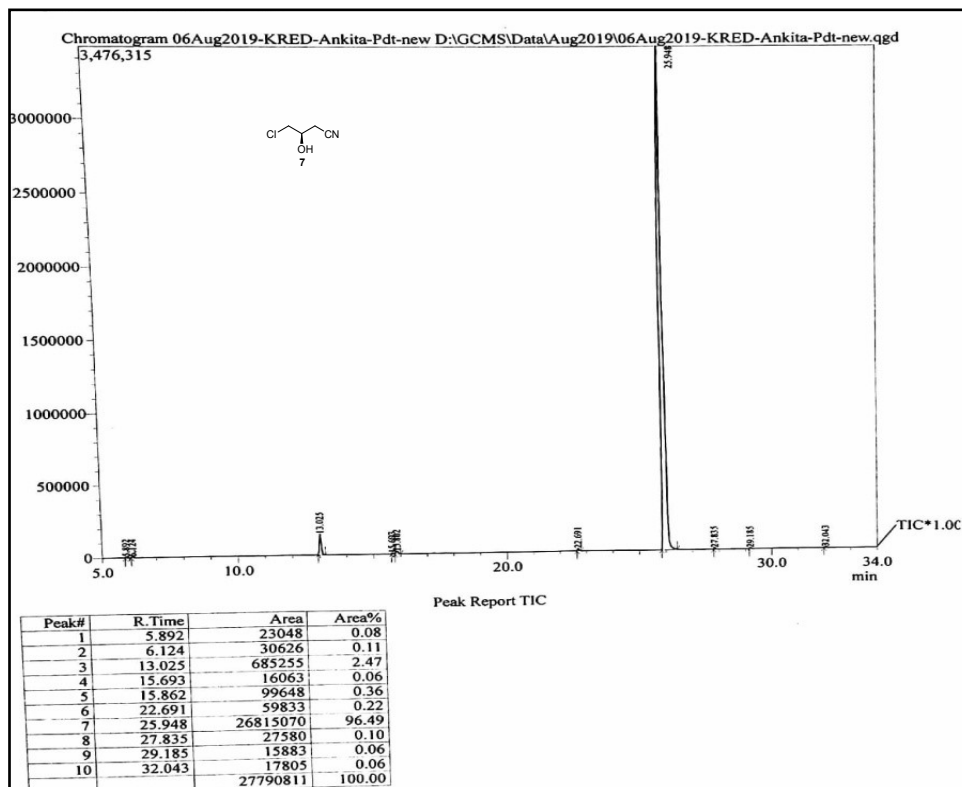

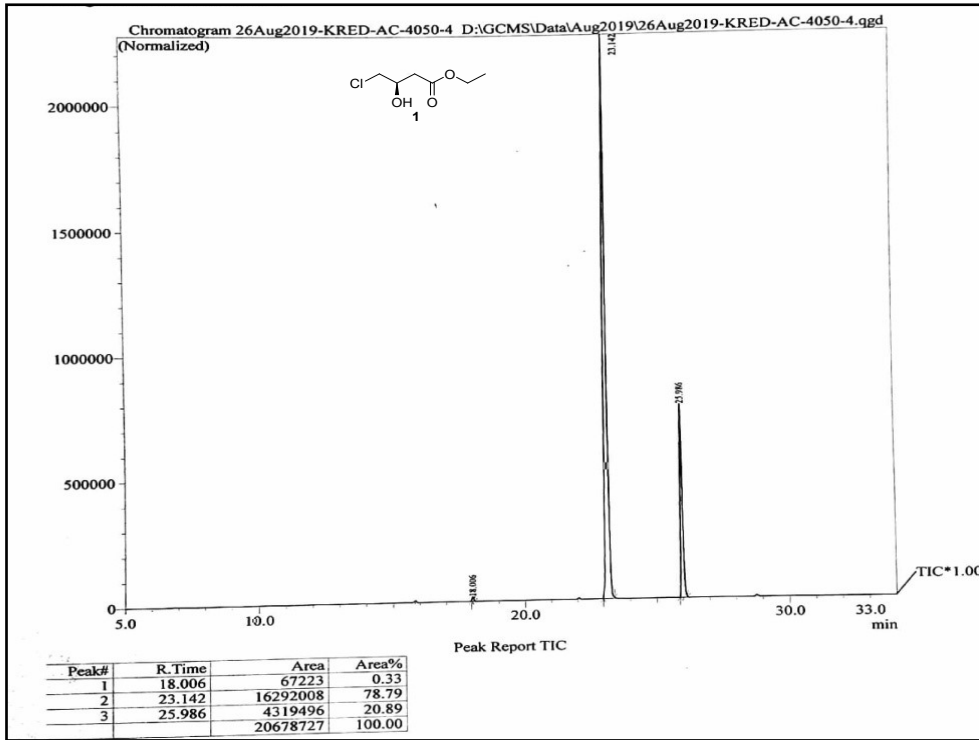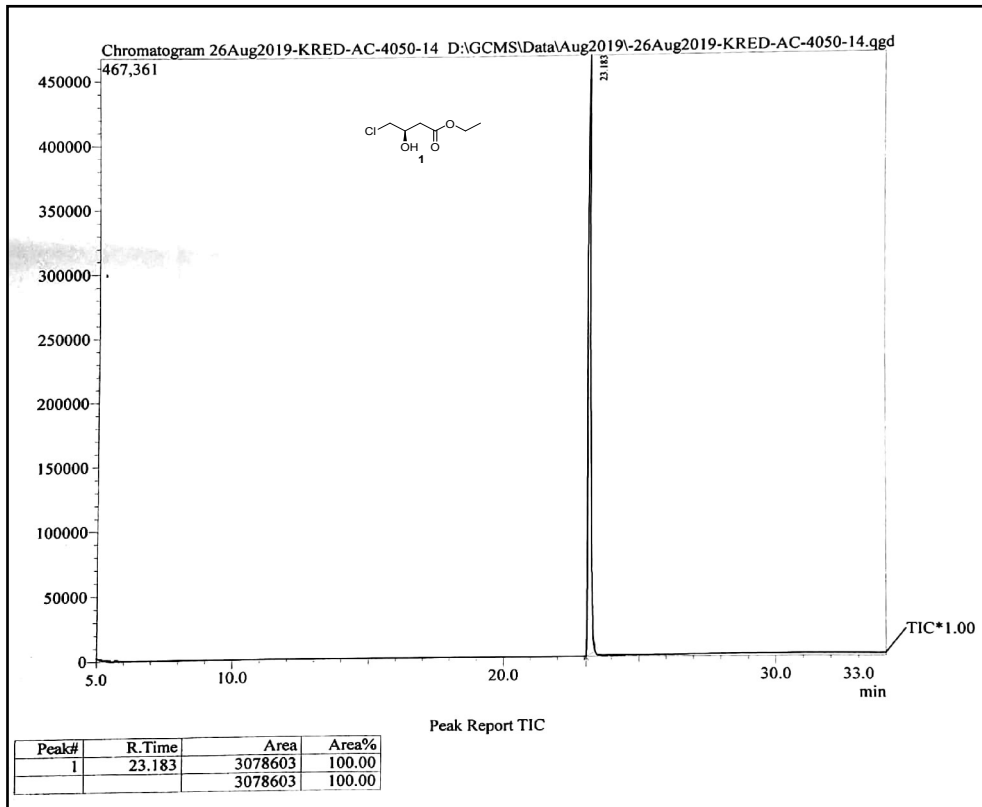



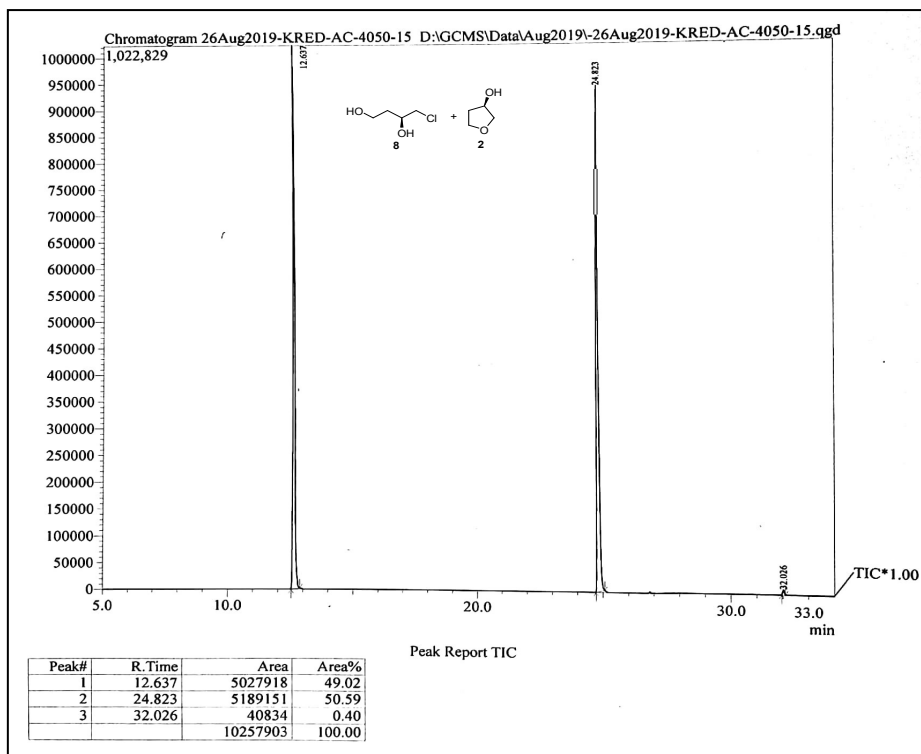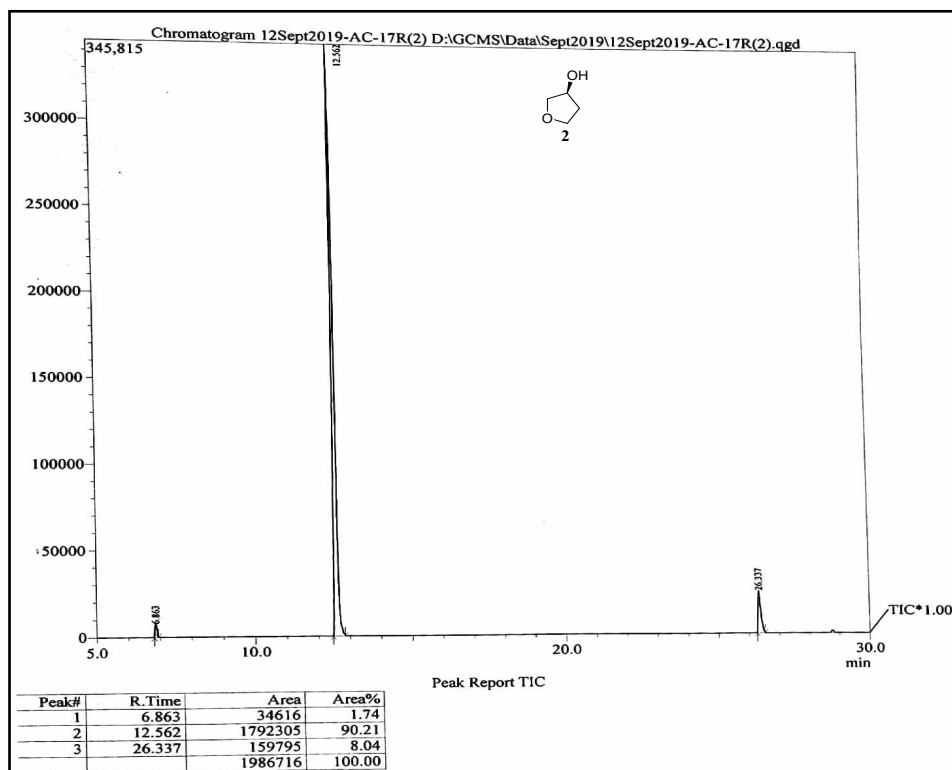

Comparison of (*R*)-Ethyl-4-chloro-3-hydroxybutanoate (1) with standard sample.

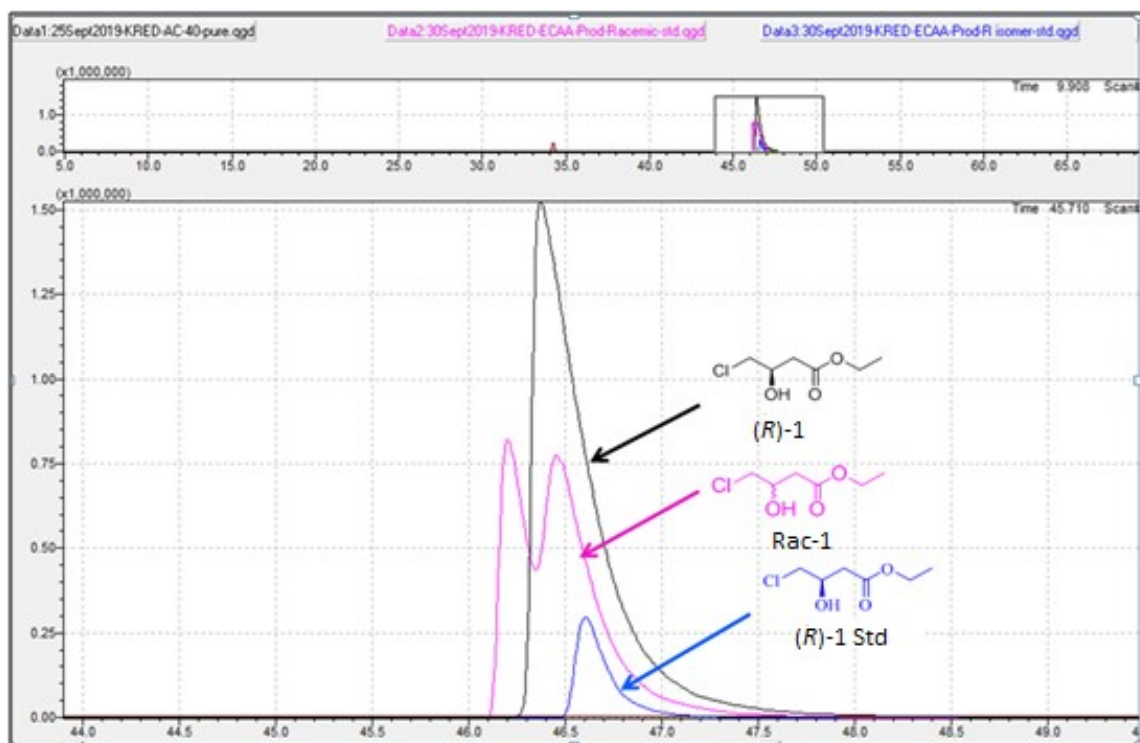

Overlap of all products in GC:

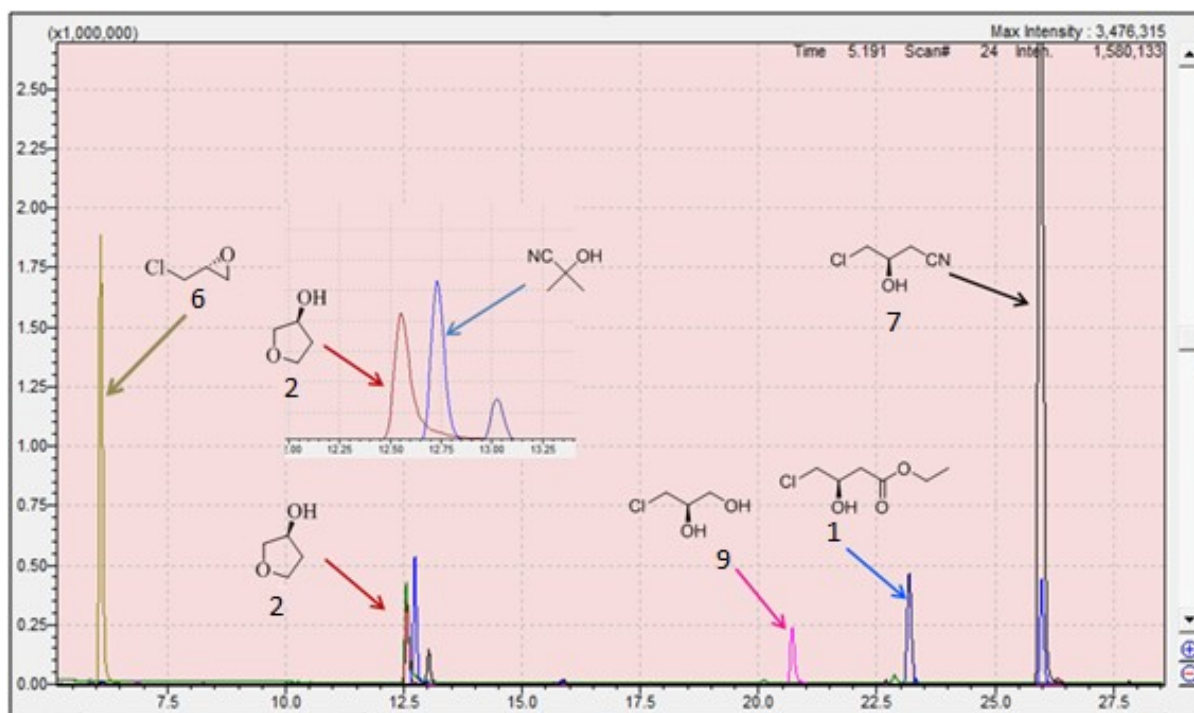

**Table S1.** Comparison of present work with reported methods

| S.No | Reaction conditions                                                                                                                                              | Remarks                                                                                                    | References    |
|------|------------------------------------------------------------------------------------------------------------------------------------------------------------------|------------------------------------------------------------------------------------------------------------|---------------|
| 1.   | HCN                                                                                                                                                              | HCN is toxic.                                                                                              | 1             |
| 2.   | NaCN, Acetic acid, pH 8 – 10.                                                                                                                                    | Using salts.                                                                                               | 2             |
| 3.   | Cyanide salt, inorganic acid. pH 8-10.                                                                                                                           | Simultaneous adjustment of pH.<br>Racemization issues.                                                     | 3             |
| 4.   | NaCN, inorganic acid,<br>pH 7 – 8.                                                                                                                               | No simultaneous pH adjustment                                                                              | 4             |
| 5.   | NaCN, Citric acid,<br>pH 7.8 – 8.3                                                                                                                               | Replaced H <sub>2</sub> SO <sub>4</sub> .                                                                  | 5             |
| 6.   | HCN (aq. solution), H <sub>2</sub> SO <sub>4</sub> , pH 8-10 & enzymatic resolution of ester.                                                                    | Process for L-Carnitine and acetyl L-Carnitine Hydrochloride.                                              | 6             |
| 7.   | Liq. HCN, several days in sealed container.                                                                                                                      | Highly toxic to handle                                                                                     | 7             |
| 8.   | HCN, KCN (cat).                                                                                                                                                  | Highly toxic to handle                                                                                     | 8             |
| 9.   | Aq. solution of HCN, KCN, Acetic acid.                                                                                                                           | -                                                                                                          | 9             |
| 10   | Ce(OTf) <sub>4</sub> , 10 mole%<br>NaCN, Neat                                                                                                                    | 6h, 85 % yield.                                                                                            | 10            |
| 11   | Ce(OTf) <sub>4</sub> , NaCN, Micellar media, rt                                                                                                                  | 7 h, 85 % yield.                                                                                           | 11            |
| 12   | i). KCN, cat. TBAB,<br>1N KOH/DCE.<br>ii). Actone cyanohydrin, Et <sub>3</sub> N, reflux.                                                                        | Product extraction issues in the biphasic system.<br>4 h, 67 % yield.                                      | 12            |
| 13   | i). Acetone cyanohydrin, 0.1 M KPB, pH 7.5–8.5<br>ii). Water: DCM (1:1), TBAB (0.1% w/w).<br>iii). Acetone cyanohydrins, 0.1 eq K <sub>2</sub> CO <sub>3</sub> . | 12h, 93% yield & 94.5% GC purity.<br>24h, 88% yield & 83.28% GC purity<br>24h, 90% yield & > 99% GC purity | Present study |

## References.

- 1 Y. Hideo, JPH01139559A, 1989 and reference cited therein.
- 2 S. W. Cho, J. H. Chang, K. W. Lee, K. K. Lee, B. R. So, H. I. Shin, PCT Int. Appl., WO 2004/092114 A1, 2004.
- 3 Y. Hiroyuki, F. Yoshiro, T. Kiwa, JP 2734876B2, 1998.
- 4 S. W. Cho, J. H. Chang, K. W. Lee, K. K. Lee, B. R. So, H. I. Shin, US Pat., 2006264652 A1, 2006.
- 5 S. J. Ho, Y. J. Won, L. H. Seong, K. H. Cheol, K. S. Jin, PCT Int. Appl., WO 2005/087715, 2005.
- 6 H. Wang, S. Ook, R. Yu, H. Youn, C. Hung, S. Ho, PCT Int. Appl., WO 2007/139238 A1, 2007.
- 7 Hormann, *Ber.*, 1879, **12**, 23.
- 8 F. Binon, *Bull.Soc. Chim. Belges.*, 1963, **72**, 166–177.
- 9 C. C. J. Culvenor, W. Davies, F. G. Haley, *J. Chem. Soc.*, 1950, 3123–3125.
- 10 N. Iranpoor, M. Shekarriz, *Synthetic Communications.*, 1999, **29**, 2249–2254.
- 11 N. Iranpoor, H. Firouzabadi, M. Shekarize, *Org. Biomol. Chem.*, 2003, **1**, 724–727.
- 12 D. Mitchel, T. M. Koenig, *Tetrahedron Lett.*, 1992, **33**, 3281–3284.
